# Supplementary material
Source: publisher figshare collection journal article supplement (https://acs.figshare.com/ndownloader/files/4264657)

# checkCIF/PLATON report

You have not supplied any structure factors. As a result the full set of tests cannot be run.

No syntax errors found.      CIF dictionary      Interpreting this report

## Datablock: I

---

Bond precision:    C-C = 0.0078 Å                      Wavelength=0.40663

Cell:                      a=25.042(4)              b=26.826(4)              c=30.848(5)  
                                alpha=90              beta=90              gamma=90

Temperature:              100 K

|                | Calculated      | Reported        |
|----------------|-----------------|-----------------|
| Volume         | 20723(6)        | 20724(6)        |
| Space group    | F m m m         | Fmmm            |
| Hall group     | -F 2 2          | ?               |
| Moiety formula | C21 H11 Cu2 O12 | ?               |
| Sum formula    | C21 H11 Cu2 O12 | C42 H22 Cu4 O24 |
| Mr             | 582.40          | 1164.76         |
| Dx,g cm-3      | 0.747           | 0.747           |
| Z              | 16              | 8               |
| Mu (mm-1)      | 0.187           | 0.167           |
| F000           | 4656.0          | 4656.0          |
| F000'          | 4663.17         |                 |
| h,k,lmax       | 27,29,34        | 25,29,33        |
| Nref           | 4004            | 3497            |
| Tmin,Tmax      |                 | 0.906,0.993     |
| Tmin'          |                 |                 |

Correction method= MULTI-SCAN

Data completeness= 0.873                      Theta(max)= 13.060

R(reflections)= 0.0762( 2068)              wR2(reflections)= 0.2520( 3497)

S = 1.001                      Npar= 166

---

The following ALERTS were generated. Each ALERT has the format

**test-name\_ALERT\_alert-type\_alert-level.**

Click on the hyperlinks for more details of the test.

---

### Alert level A

PLAT029\_ALERT\_3\_A \_diffn\_measured\_fraction\_theta\_full Low ..... 0.874

**Author Response: Complete dataset could not be collected due to the limited availability of synchrotron beam time.**

---

**Alert level B**

REFLT03\_ALERT\_3\_B Reflection count < 90% complete (theta max?)  
From the CIF: \_diffrn\_reflms\_theta\_max 13.06  
From the CIF: \_diffrn\_reflms\_theta\_full 13.06  
From the CIF: \_reflms\_number\_total 3497  
TEST2: Reflms within \_diffrn\_reflms\_theta\_max  
Count of symmetry unique reflms 4004  
Completeness (\_total/calc) 87.34%

THETM01\_ALERT\_3\_B The value of sine(theta\_max)/wavelength is less than 0.575  
Calculated sin(theta\_max)/wavelength = 0.5557

PLAT022\_ALERT\_3\_B Ratio Unique / Expected Reflections (too) Low .. 0.873  
PLAT023\_ALERT\_3\_B Resolution (too) Low [sin(theta)/Lambda < 0.6].. 13.06 Deg.  
PLAT049\_ALERT\_1\_B Calculated Density less than 1.0 gcm-3 ..... 0.7467  
PLAT241\_ALERT\_2\_B Check High Ueq as Compared to Neighbors for 05  
PLAT242\_ALERT\_2\_B Check Low Ueq as Compared to Neighbors for Cu01  
PLAT242\_ALERT\_2\_B Check Low Ueq as Compared to Neighbors for Cu02  
PLAT430\_ALERT\_2\_B Short Inter D...A Contact 03 .. 05 .. 2.69 Ang.  
PLAT430\_ALERT\_2\_B Short Inter D...A Contact 03 .. 03 .. 2.70 Ang.  
PLAT430\_ALERT\_2\_B Short Inter D...A Contact 04 .. 07 .. 2.72 Ang.  
PLAT430\_ALERT\_2\_B Short Inter D...A Contact 04 .. 04 .. 2.72 Ang.  
PLAT430\_ALERT\_2\_B Short Inter D...A Contact 05 .. 05 .. 2.68 Ang.  
PLAT430\_ALERT\_2\_B Short Inter D...A Contact 07 .. 07 .. 2.74 Ang.

---

**Alert level C**

RFACR01\_ALERT\_3\_C The value of the weighted R factor is > 0.25  
Weighted R factor given 0.252

PLAT045\_ALERT\_1\_C Calculated and Reported Z Differ by ..... 2.00 Ratio  
PLAT048\_ALERT\_1\_C MoietyFormula Not Given ..... ?  
PLAT232\_ALERT\_2\_C Hirshfeld Test Diff (M-X) Cu02 -- 05 .. 10.0 su  
PLAT241\_ALERT\_2\_C Check High Ueq as Compared to Neighbors for 04  
PLAT241\_ALERT\_2\_C Check High Ueq as Compared to Neighbors for 08  
PLAT242\_ALERT\_2\_C Check Low Ueq as Compared to Neighbors for C1  
PLAT242\_ALERT\_2\_C Check Low Ueq as Compared to Neighbors for C12  
PLAT250\_ALERT\_2\_C Large U3/U1 Ratio for Average U(i,j) Tensor .... 2.2  
PLAT341\_ALERT\_3\_C Low Bond Precision on C-C Bonds ..... 0.0078 Ang

---

**Alert level G**

ABSMU\_01 Radiation type not identified. Calculation of  
\_exptl\_absorpt\_correction\_mu not performed.

REFLT03\_ALERT\_1\_G ALERT: Expected hkl max differ from CIF values  
From the CIF: \_diffrn\_reflms\_theta\_max 13.06  
From the CIF: \_reflms\_number\_total 3497  
From the CIF: \_diffrn\_reflms\_limit\_max hkl 21. 29. 25.  
From the CIF: \_diffrn\_reflms\_limit\_min hkl -25. -25. -33.  
TEST1: Expected hkl limits for theta max  
Calculated maximum hkl 27. 29. 34.  
Calculated minimum hkl -27. -29. -34.

PLAT003\_ALERT\_2\_G Number of Uiso or Uij Restrained Atom Sites .... 6  
PLAT005\_ALERT\_5\_G No \_iucr\_refine\_instructions\_details in CIF .... ?  
PLAT072\_ALERT\_2\_G SHELXL First Parameter in WGHT Unusually Large. 0.18  
PLAT335\_ALERT\_2\_G Check Large C6 Ring C-C Range C2 -C7 0.15 Ang.  
PLAT432\_ALERT\_2\_G Short Inter X...Y Contact C9 .. C10 .. 2.54 Ang.  
PLAT432\_ALERT\_2\_G Short Inter X...Y Contact C9 .. C9 .. 3.03 Ang.

|                   |                                                    |       |    |     |    |      |       |
|-------------------|----------------------------------------------------|-------|----|-----|----|------|-------|
| PLAT432_ALERT_2_G | Short Inter X...Y Contact                          | C10   | .. | C10 | .. | 1.40 | Ang.  |
| PLAT432_ALERT_2_G | Short Inter X...Y Contact                          | C10   | .. | C11 | .. | 2.39 | Ang.  |
| PLAT432_ALERT_2_G | Short Inter X...Y Contact                          | C10   | .. | C10 | .. | 2.41 | Ang.  |
| PLAT432_ALERT_2_G | Short Inter X...Y Contact                          | C10   | .. | C10 | .. | 2.78 | Ang.  |
| PLAT432_ALERT_2_G | Short Inter X...Y Contact                          | C11   | .. | C11 | .. | 2.73 | Ang.  |
| PLAT606_ALERT_4_G | VERY LARGE Solvent Accessible VOID(S) in Structure |       |    |     |    |      | !     |
| PLAT720_ALERT_4_G | Number of Unusual/Non-Standard Labels              | ..... |    |     |    | 2    |       |
| PLAT764_ALERT_4_G | Overcomplete CIF Bond List Detected (Rep/Expd)     |       |    |     |    | 1.19 | Ratio |
| PLAT804_ALERT_5_G | ARU-Pack Problem in PLATON Analysis                | ..... |    |     |    | 73   | Times |
| PLAT860_ALERT_3_G | Note: Number of Least-Squares Restraints           | ..... |    |     |    | 21   |       |
| PLAT869_ALERT_4_G | ALERTS Related to the use of SQUEEZE Suppressed    |       |    |     |    |      | !     |
| PLAT950_ALERT_5_G | Reported and Calculated Hmax Values Differ by      | ..    |    |     |    | 2    |       |

---

1 **ALERT level A** = Most likely a serious problem - resolve or explain  
 14 **ALERT level B** = A potentially serious problem, consider carefully  
 10 **ALERT level C** = Check. Ensure it is not caused by an omission or oversight  
 19 **ALERT level G** = General information/check it is not something unexpected

4 ALERT type 1 CIF construction/syntax error, inconsistent or missing data  
 25 ALERT type 2 Indicator that the structure model may be wrong or deficient  
 8 ALERT type 3 Indicator that the structure quality may be low  
 4 ALERT type 4 Improvement, methodology, query or suggestion  
 3 ALERT type 5 Informative message, check

---

## checkCIF publication errors

---

### Alert level A

PUBL004\_ALERT\_1\_A The contact author's name and address are missing,  
                   \_publ\_contact\_author\_name and \_publ\_contact\_author\_address.  
 PUBL005\_ALERT\_1\_A \_publ\_contact\_author\_email, \_publ\_contact\_author\_fax and  
                   \_publ\_contact\_author\_phone are all missing.  
                   At least one of these should be present.  
 PUBL006\_ALERT\_1\_A \_publ\_requested\_journal is missing  
                   e.g. 'Acta Crystallographica Section C'  
 PUBL008\_ALERT\_1\_A \_publ\_section\_title is missing. Title of paper.  
 PUBL009\_ALERT\_1\_A \_publ\_author\_name is missing. List of author(s) name(s).  
 PUBL010\_ALERT\_1\_A \_publ\_author\_address is missing. Author(s) address(es).  
 PUBL012\_ALERT\_1\_A \_publ\_section\_abstract is missing.  
                   Abstract of paper in English.

---

### Alert level G

PUBL013\_ALERT\_1\_G The \_publ\_section\_comment (discussion of study) is  
                   missing. This is required for a full paper submission (but is  
                   optional for an electronic paper).

---

7 **ALERT level A** = Data missing that is essential or data in wrong format  
 1 **ALERT level G** = General alerts. Data that may be required is missing

---

## Publication of your CIF

You should attempt to resolve as many as possible of the alerts in all categories. Often the minor alerts point to easily fixed oversights, errors and omissions in your CIF or refinement strategy, so attention to these fine details can be worthwhile. In order to resolve some of the more serious problems it may be necessary to carry out additional measurements or structure refinements. However, the nature of your study may justify the reported deviations from journal submission requirements and the more serious of these should be commented upon in the discussion or experimental section of a paper or in the "special\_details" fields of the CIF. *checkCIF* was carefully designed to identify outliers and unusual parameters, but every test has its limitations and alerts that are not important in a particular case may appear. Conversely, the absence of alerts does not guarantee there are no aspects of the results needing attention. It is up to the individual to critically assess their own results and, if necessary, seek expert advice.

If level A alerts remain, which you believe to be justified deviations, and you intend to submit this CIF for publication in Acta Crystallographica Section C or Section E, you should additionally insert an explanation in your CIF using the Validation Reply Form (VRF) below. Your explanation will be considered as part of the review process.

If you intend to submit to another section of Acta Crystallographica or Journal of Applied Crystallography or Journal of Synchrotron Radiation, you should make sure that at least a basic structural check is run on the final version of your CIF prior to submission.

```
# start Validation Reply Form
_vrf_PUBL004_GLOBAL
;
PROBLEM: The contact author's name and address are missing,
RESPONSE: ...
;
_vrf_PUBL005_GLOBAL
;
PROBLEM: _publ_contact_author_email, _publ_contact_author_fax and
RESPONSE: ...
;
_vrf_PUBL006_GLOBAL
;
PROBLEM: _publ_requested_journal is missing
RESPONSE: ...
;
_vrf_PUBL008_GLOBAL
;
PROBLEM: _publ_section_title is missing. Title of paper.
RESPONSE: ...
;
_vrf_PUBL009_GLOBAL
;
PROBLEM: _publ_author_name is missing. List of author(s) name(s).
RESPONSE: ...
;
_vrf_PUBL010_GLOBAL
;
PROBLEM: _publ_author_address is missing. Author(s) address(es).
RESPONSE: ...
;
_vrf_PUBL012_GLOBAL
;
```

PROBLEM: \_publ\_section\_abstract is missing.  
RESPONSE: ...  
;  
# end Validation Reply Form

If you wish to submit your CIF for publication in Acta Crystallographica Section C or E, you should upload your CIF via the web. If your CIF is to form part of a submission to another IUCr journal, you will be asked, either during electronic submission or by the Co-editor handling your paper, to upload your CIF via our web site.

---

**PLATON version of 18/07/2011; check.def file version of 04/07/2011**

Datablock I - ellipsoid plot

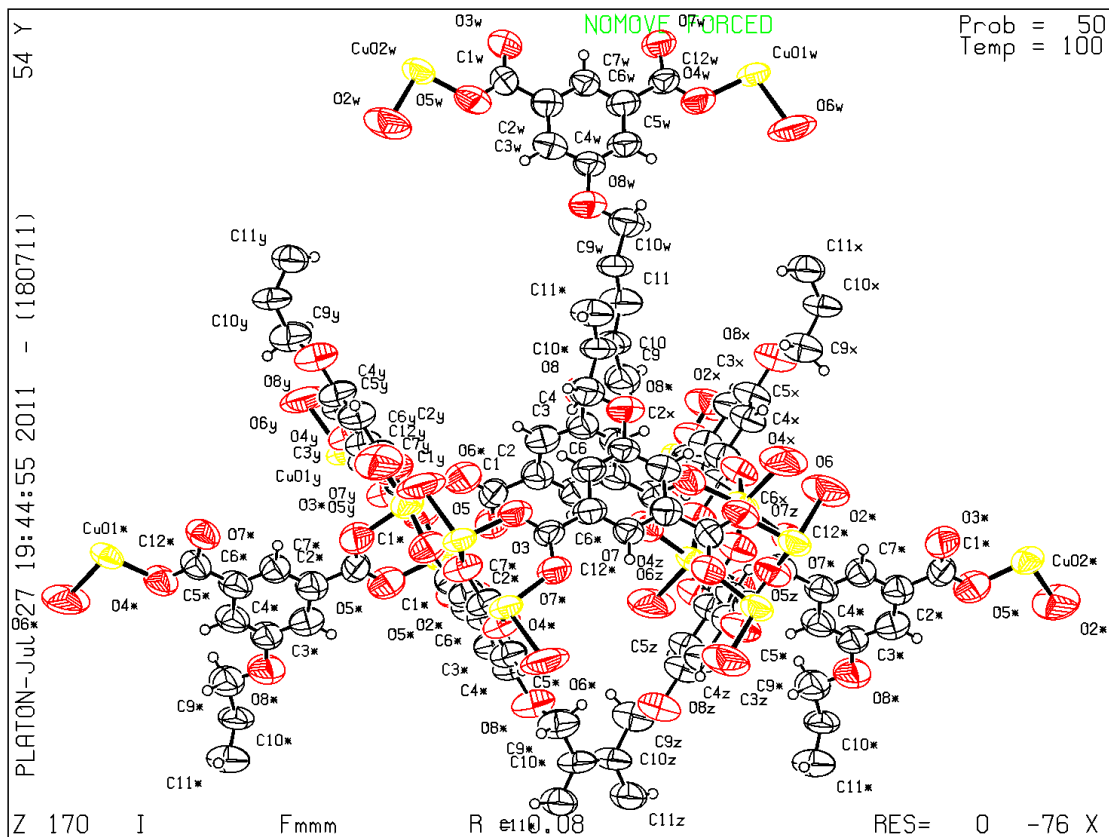

Supplement: Supplementary file 1 [file 4264657]
